# Supplementary material for: Topical Photodynamic Therapy with Different Forms of 5-Aminolevulinic Acid in the Treatment of Actinic Keratosis
Source: MDPI journal article supplement (doi:10.3390/pharmaceutics14020346), 2022-02-01
Supplement: s1 [file s1]

# Supplementary Materials: Topical Photodynamic Therapy with Different Forms of 5-Aminolevulinic Acid in the Treatment of Actinic Keratosis

Joanna Bartosińska, Paulina Szczepanik-Kułał, Dorota Raczkiewicz, Marta Niewiedziół, Agnieszka Gerkowicz, Dorota Kowalczyk, Mirosław Kwaśny and Dorota Krasowska

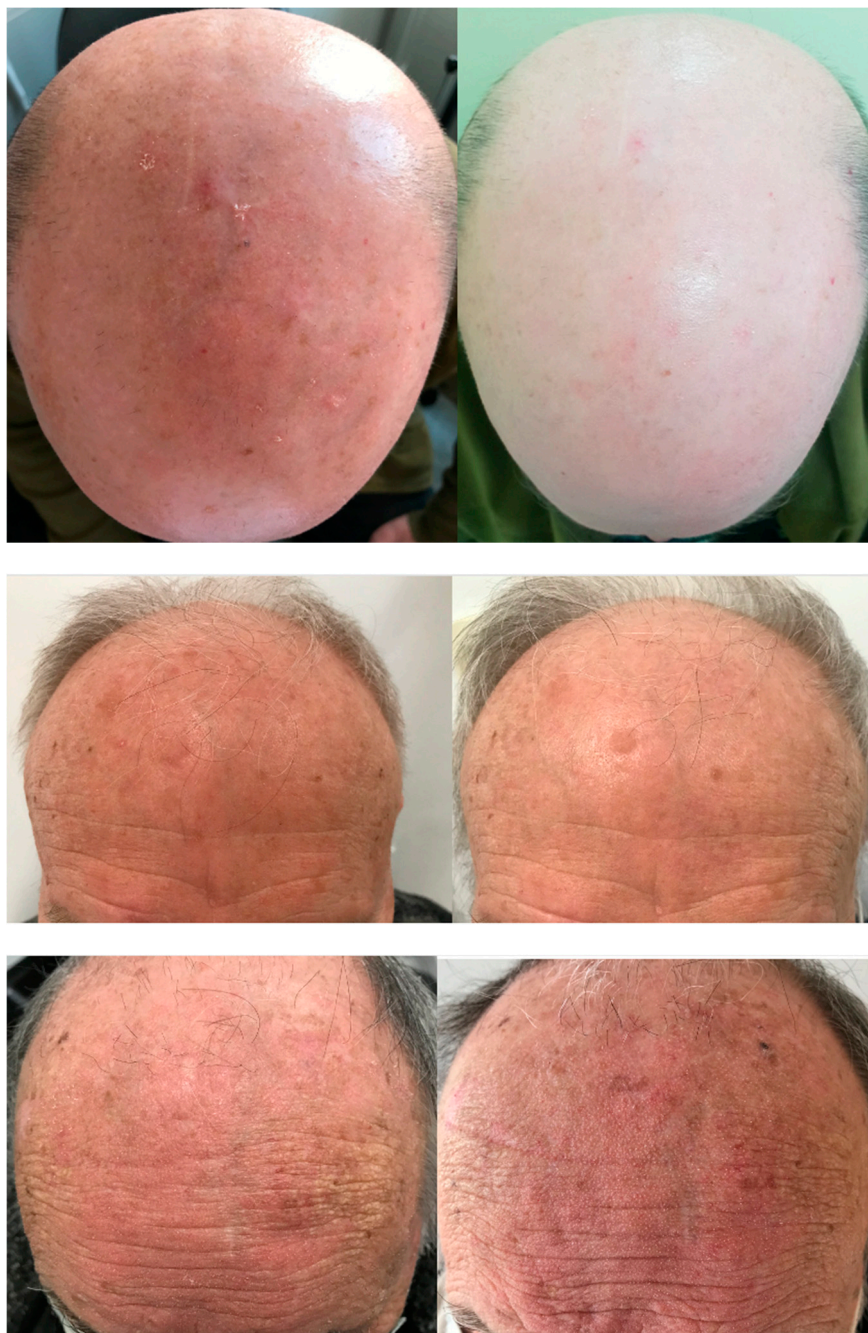

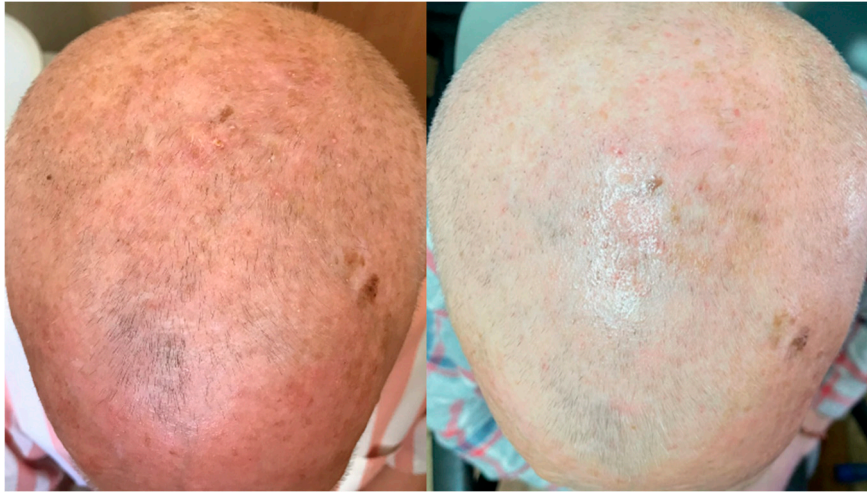

**Figure S1.** The comparisons of the skin areas in the studied patients before PDT and 12 weeks after the procedure completion.
